# Supplementary material for: Bioactive titaminates from molecular layer deposition
Source: Royal Society of Chemistry journal article supplement (doi:10.1039/c7ra01918a), 2017-01-01
Supplement: c7ra01918a1.pdf [file c7ra01918a1.pdf]

Electronic Supplementary Material (ESI) for RSC Advances.

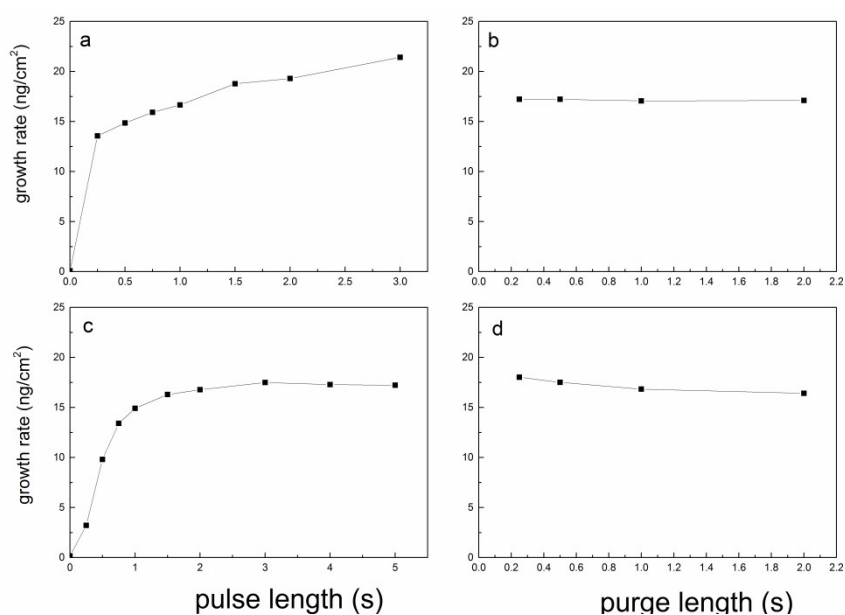

**Supplementary 1.** The growth rate of the QCM system as function of (a) length of TTIP pulse, (b), TTIP purge (c), glycine pulse (d), glycine purge. The basis pulse sequence was 1 s pulse TTIP, 1 s purge, 2 s pulse glycine, 1 s purge.

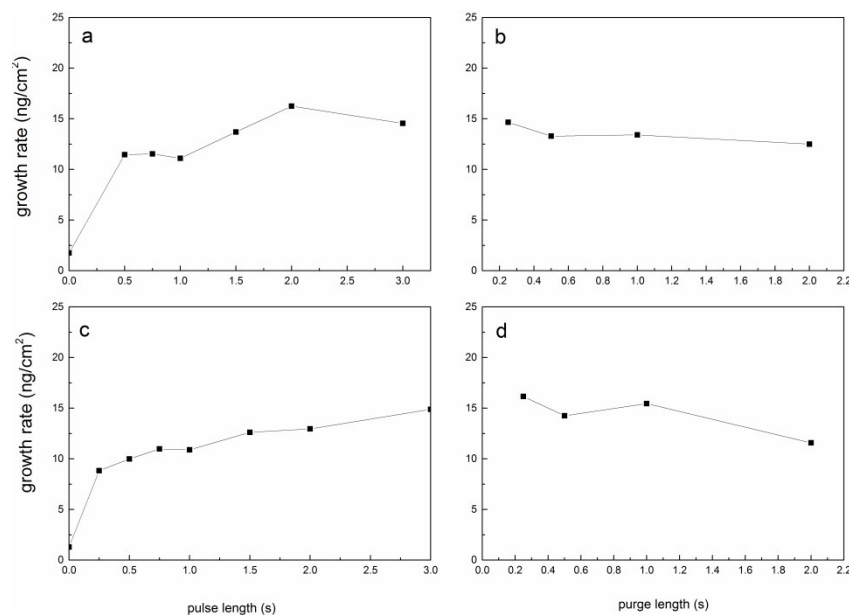

**Supplementary 2.** The growth rate of the QCM system as function of (a) length of TTIP pulse, (b), TTIP purge (c), aspartic acid pulse (d), aspartic acid purge. The basis pulse sequence was 1 s pulse TTIP, 2 s purge, 5 s pulse aspartic acid, 1 s purge.

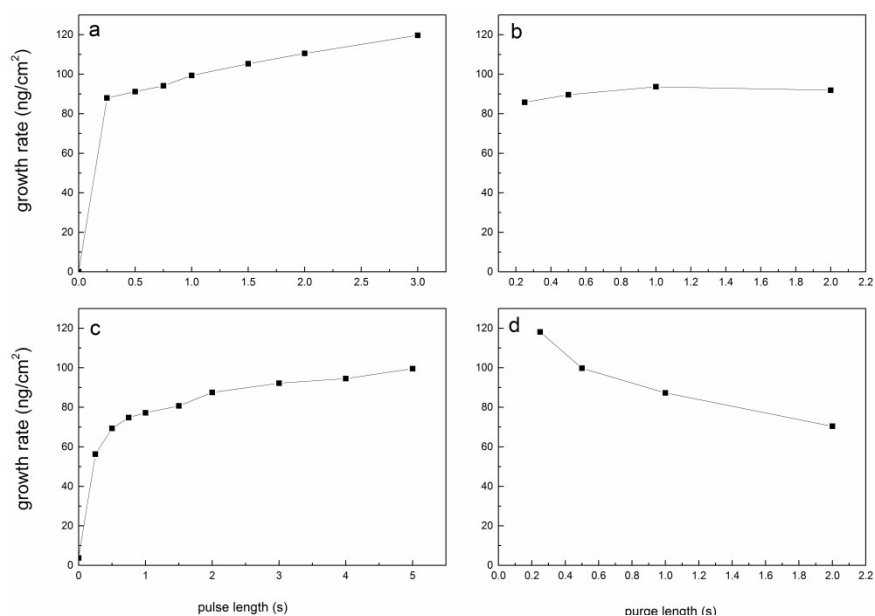

**Supplementary 3.** The growth rate of the QCM system as function of (a) length of TTIP pulse, (b), TTIP purge (c), succinic acid pulse (d), succinic purge. The basis pulse sequence was 2 s pulse TTIP, 1 s purge, 3 s pulse succinic acid, 1 s purge.

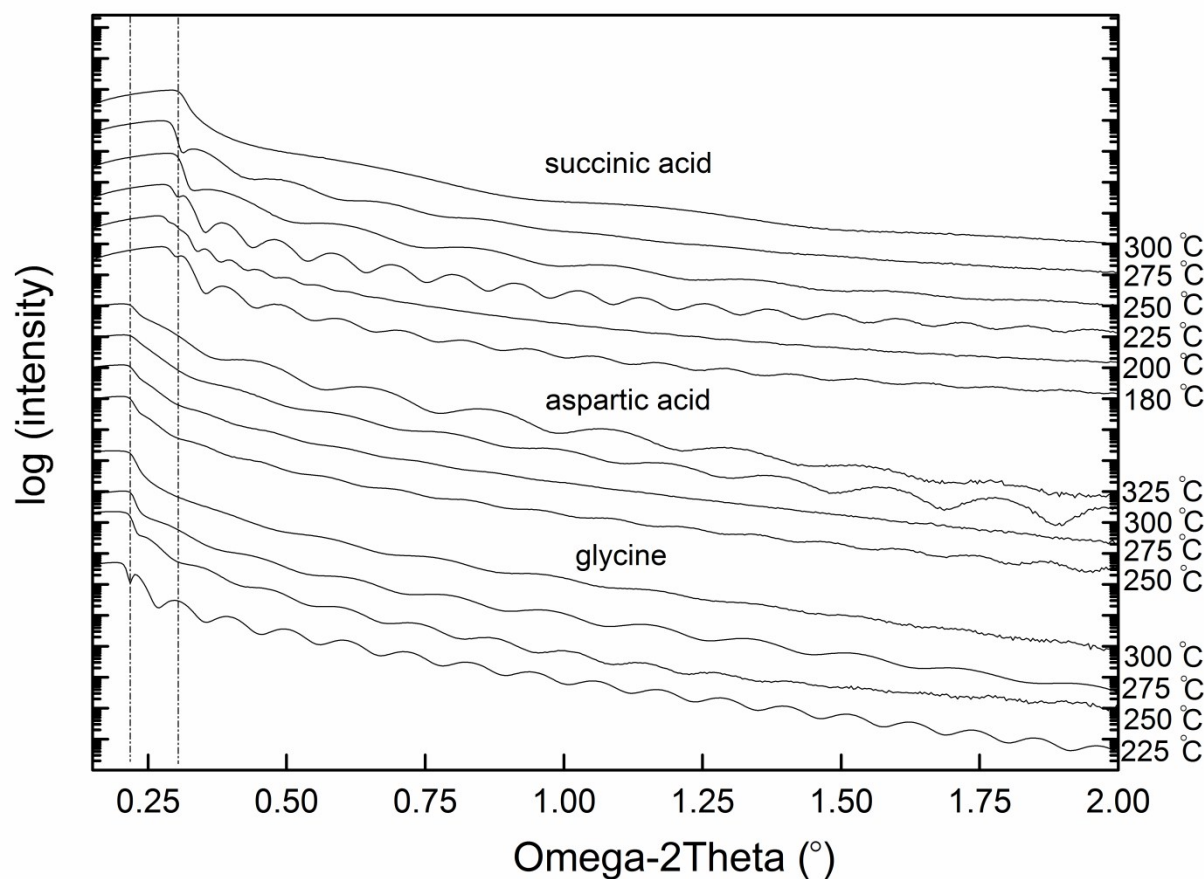

**Supplementary 4.** Logarithmic intensity versus incident angle obtained from XRR measurements on thin films of glycine, aspartic acid, and succinic acid deposited at different temperatures.
